# Supplementary material for: Combined effects of parental and active smoking on early lung function deficits: a prospective study from birth to age 26 years
Source: HighWire-hosted journal article supplement (doi:10.1136/thoraxjnl-2013-203538), 2013-07-11
Supplement: thoraxjnl-2013-203538supp.pdf [file thoraxjnl-2013-203538supp.pdf]

## **Online Supplement**

**Combined effects of parental and active smoking on early lung function deficits: a prospective study from birth to age 26 years.**

S Guerra, DA Stern, M Zhou, DL Sherrill, AL Wright, WJ Morgan, FD Martinez

### *Lung function testing*

At YR11, spirometry was done with a custom-built, pneumotachometer-based system, running software on a portable computer(24), and at YR16, YR22, and YR26 with a portable Schiller Spirovit SP-1 (Schiller AG, Baar, Switzerland)(25). We calibrated these systems with a Jones flow-volume calibrator (Model FVC-3000; Jones Medical Instrumentation Company, Oakbrook, IL, USA). No subjects had used a bronchodilator within 6 hours of testing. Subsequent to baseline measurements, a fixed dose of 2 puffs of albuterol (180 µg) was administered from a metered-dose inhaler and aerochamber holding device (Monaghan Medical Corp, Plattsburgh, NY) and the post bronchodilator spirometry was obtained 15 minutes thereafter.

**Figure E1.** Categorization of subjects based on parental and active smoking

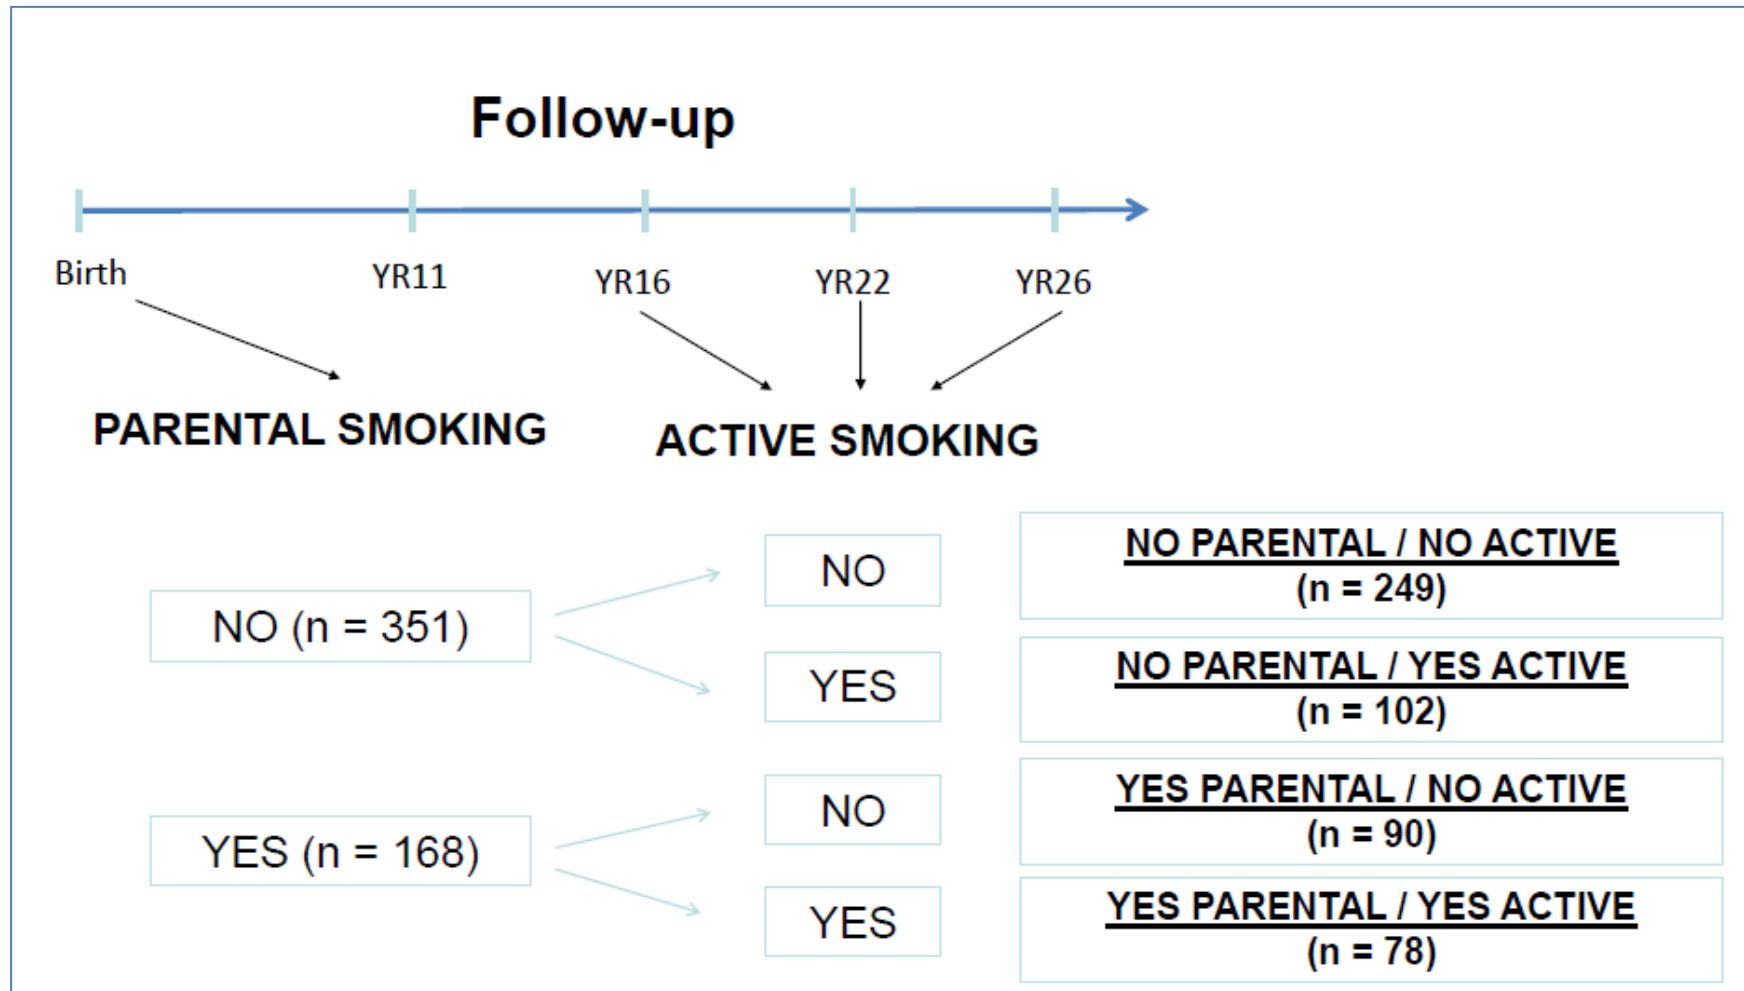

**Table E1.** Mean and 95% Confidence Intervals of baseline (before bronchodilator) FEV1/FVC residuals at age 11, 16, 22, and 26 years and of their linear trends between age 11 and 26 years across maternal smoking, paternal smoking, and their combinations with active smoking.

|                         |         | FEV1/FVC residuals |                     | FEV1/FVC residuals  |                     | FEV1/FVC residuals  |                     | FEV1/FVC residuals  |                     | Linear trend of FEV1/FVC residuals from YR11 to YR26 |                     |                      |
|-------------------------|---------|--------------------|---------------------|---------------------|---------------------|---------------------|---------------------|---------------------|---------------------|------------------------------------------------------|---------------------|----------------------|
|                         |         | YR11               |                     | YR16                |                     | YR22                |                     | YR26                |                     | YR26                                                 |                     |                      |
|                         |         | N                  | Mean (95%CI)        | N                   | Mean (95%CI)        | N                   | Mean (95%CI)        | N                   | Mean (95%CI)        | N                                                    | Mean (95%CI)        |                      |
| <b>Maternal Smoking</b> |         |                    |                     |                     |                     |                     |                     |                     |                     |                                                      |                     |                      |
|                         | No      | 366                | 0.02 (-0.61, 0.65)  | 329                 | 0.17 (-0.55, 0.89)  | 387                 | 0.12 (-0.55, 0.78)  | 296                 | 0.12 (-0.59, 0.84)  | 418                                                  | -0.02 (-0.08, 0.03) |                      |
|                         | Yes     | 60                 | -0.14 (-1.65, 1.37) | 53                  | -1.04 (-2.84, 0.76) | 66                  | -0.68 (-2.31, 0.96) | 54                  | -0.67 (-2.46, 1.13) | 70                                                   | -0.10 (-0.19, 0.00) |                      |
|                         | P-value |                    | 0.85                |                     | 0.22                |                     | 0.37                |                     | 0.40                |                                                      | 0.09                |                      |
| <b>Maternal Active</b>  |         |                    |                     |                     |                     |                     |                     |                     |                     |                                                      |                     |                      |
|                         | No      | No                 | 249                 | 0.07 (-0.69, 0.83)  | 230                 | 0.07 (-0.80, 0.93)  | 269                 | 0.31 (-0.48, 1.11)  | 203                 | 0.42 (-0.48, 1.32)                                   | 287                 | 0.02 (-0.05, 0.08)   |
|                         | No      | Yes                | 117                 | -0.08 (-1.23, 1.06) | 99                  | 0.40 (-0.92, 1.73)  | 118                 | -0.34 (-1.57, 0.89) | 93                  | -0.53 (-1.70, 0.65)                                  | 131                 | -0.11 (-0.22, 0.01)  |
|                         | Yes     | No                 | 30                  | -0.95 (-3.01, 1.11) | 25                  | -2.13 (-4.9, 0.54)  | 31                  | -1.18 (-3.37, 1.00) | 27                  | -0.15 (-2.16, 2.45)                                  | 34                  | 0.05 (-0.04, 0.14)   |
|                         | Yes     | Yes                | 30                  | 0.67 (-1.63, 2.97)  | 28                  | -0.07 (-2.62, 2.48) | 35                  | -0.23 (-2.72, 2.27) | 27                  | -1.48 (-4.36, 1.39)                                  | 36                  | -0.24 (-0.39, -0.08) |
|                         | P-value |                    | 0.76                |                     | 0.40                |                     | 0.59                |                     | 0.38                |                                                      | 0.002               |                      |
| <b>Paternal Smoking</b> |         |                    |                     |                     |                     |                     |                     |                     |                     |                                                      |                     |                      |
|                         | No      | 313                | 0.15 (-0.55, 0.85)  | 281                 | 0.09 (-0.72, 0.89)  | 331                 | 0.21 (-0.50, 0.93)  | 253                 | 0.36 (-0.43, 1.15)  | 355                                                  | -0.02 (-0.08, 0.04) |                      |
|                         | Yes     | 113                | -0.42 (-1.42, 0.59) | 101                 | -0.24 (-1.44, 0.95) | 122                 | -0.58 (-1.79, 0.63) | 97                  | -0.94 (-2.17, 0.29) | 133                                                  | -0.07 (-0.15, 0.01) |                      |
|                         | P-value |                    | 0.4                 |                     | 0.7                 |                     | 0.3                 |                     | 0.08                |                                                      | 0.11                |                      |
| <b>Paternal Active</b>  |         |                    |                     |                     |                     |                     |                     |                     |                     |                                                      |                     |                      |
|                         | No      | No                 | 214                 | 0.13 (-0.70, 0.96)  | 201                 | -0.16 (-1.12, 0.79) | 234                 | 0.24 (-0.60, 1.08)  | 179                 | 0.42 (-0.54, 1.39)                                   | 246                 | 0.03 (-0.04, 0.10)   |
|                         | No      | Yes                | 99                  | 0.20 (-1.12, 1.52)  | 80                  | 0.72 (-0.78, 2.23)  | 97                  | 0.15 (-1.23, 1.53)  | 74                  | 0.21 (-1.14, 1.56)                                   | 109                 | -0.12 (-0.25, 0.01)  |
|                         | Yes     | No                 | 65                  | -0.58 (-1.95, 0.78) | 54                  | -0.09 (-1.69, 1.51) | 66                  | -0.12 (-1.76, 1.53) | 51                  | 0.27 (-1.38, 1.91)                                   | 75                  | 0.00 (-0.11, 0.10)   |
|                         | Yes     | Yes                | 48                  | -0.20 (-1.74, 1.34) | 47                  | -0.42 (-2.28, 1.44) | 56                  | -1.12 (-2.95, 0.71) | 46                  | -2.28 (-4.11, -0.44)                                 | 58                  | -0.15 (-0.29, -0.02) |
|                         | P-value |                    | 0.84                |                     | 0.74                |                     | 0.58                |                     | 0.07                |                                                      | 0.007               |                      |

**Table E2.** Linear trends of baseline (before bronchodilator) residuals for FEV1, FVC, FEF<sub>25-75</sub>, and FEF<sub>25-75</sub>/FVC between year 11 and 26 across groups of combination of parental and active smoking.

| Combined Smoking Groups |                |     | FEV1 residuals        | FVC residuals         | FEF <sub>25-75</sub> residuals | FEF <sub>25-75</sub> /FVC residuals |
|-------------------------|----------------|-----|-----------------------|-----------------------|--------------------------------|-------------------------------------|
| Parental                | Active 16-26yr | N   | Mean (95%CI)          | Mean (95%CI)          | Mean (95%CI)                   | Mean (95%CI)                        |
| No                      | No             | 233 | -3.31 (-7.71, 1.09)   | -6.77 (-11.28, -2.27) | -0.82 (-9.98, 8.34)            | 0.03 (-0.18, 0.25)                  |
| No                      | Yes            | 95  | -2.48 (-9.35, 4.40)   | 1.68 (-5.55, 8.91)    | -8.74 (-25.70, 8.22)           | -0.28 (-0.72, 0.15)                 |
| Yes                     | No             | 88  | 0.99 (-5.04, 7.02)    | 2.60 (-4.37, 9.57)    | 0.41 (-11.22, 12.04)           | 0.06 (-0.22, 0.34)                  |
| Yes                     | Yes            | 72  | -9.99 (-18.64, -1.35) | -3.23 (-12.41, 5.96)  | -26.02 (-40.19, -11.85)        | -0.51 (-0.84, -0.18)                |
| P-value                 |                |     | 0.03                  | 0.03                  | <0.001                         | 0.01                                |

**Table E3.** Linear trends of post bronchodilator residuals for FEV1, FVC, FEF<sub>25-75</sub>, and FEF<sub>25-75</sub>/FVC between year 11 and 26 across groups of combination of parental and active smoking.

| Combined Smoking Groups |                |     | FEV1 residuals       | FVC residuals        | FEF <sub>25-75</sub> residuals | FEF <sub>25-75</sub> /FVC residuals |
|-------------------------|----------------|-----|----------------------|----------------------|--------------------------------|-------------------------------------|
| Parental                | Active 16-26yr | N   | Mean (95%CI)         | Mean (95%CI)         | Mean (95%CI)                   | Mean (95%CI)                        |
| No                      | No             | 229 | -4.38 (-9.61, 0.85)  | -5.08 (-9.88, -0.28) | -3.35 (-15.37, 8.66)           | -0.03 (-0.29, 0.24)                 |
| No                      | Yes            | 92  | 0.42 (-7.37, 8.22)   | 0.21 (-6.94, 7.36)   | 1.34 (-20.37, 23.04)           | -0.05 (-0.54, 0.43)                 |
| Yes                     | No             | 85  | 0.78 (-5.17, 6.73)   | 3.20 (-3.76, 10.15)  | -1.65 (-13.21, 9.91)           | 0.05 (-0.23, 0.32)                  |
| Yes                     | Yes            | 71  | -7.14 (-15.09, 0.80) | -1.73 (-10.42, 6.95) | -17.07 (-34.26, 0.12)          | -0.39 (-0.81, 0.02)                 |
| P-value                 |                |     | 0.11                 | 0.05                 | 0.19                           | 0.42                                |
